# Supplementary material for: Chain length variation to probe the mechanism of accelerator additives in copper electrodeposition
Source: Royal Society of Chemistry journal article supplement (doi:10.1039/c9cp00839j), 2019-01-01
Supplement: c9cp00839j1.pdf [file c9cp00839j1.pdf]

## Chain Length Variation to Probe Mechanism of Accelerator Additives in Copper Electrodeposition

Kevin G. Schmitt<sup>a</sup>, Ralf Schmidt<sup>b,\*</sup>, Josef Gaida<sup>b</sup>, Andrew A. Gewirth<sup>a,\*</sup>

<sup>a</sup> Department of Chemistry, University of Illinois at Urbana-Champaign, 600 S Mathews Avenue, Urbana, Illinois, 61801

<sup>b</sup> Atotech Deutschland GmbH, 10553 Berlin, Germany

### Supporting Information

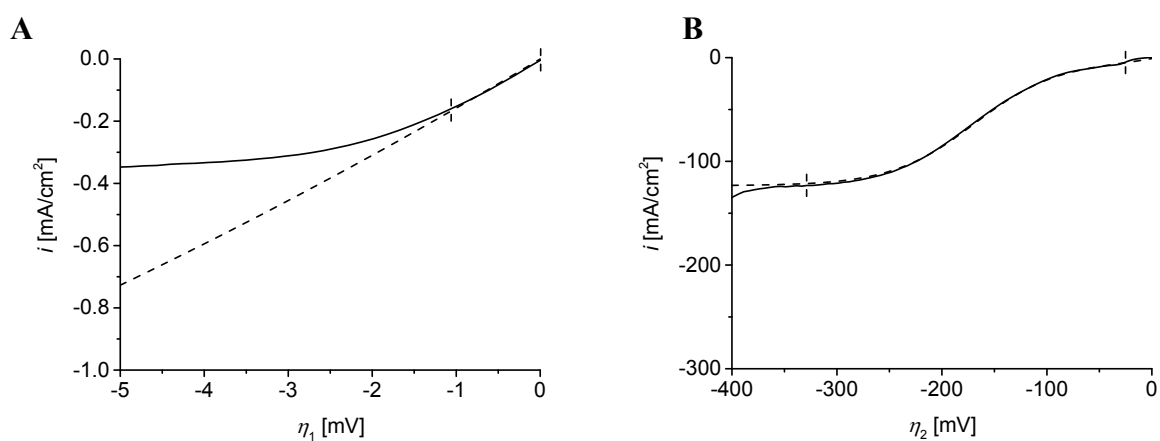

**Figure S1.** (A) Experimental LSV data for VMS with chloride and SES (solid line) and corresponding fit with equation (3) (dashed line). (B) Experimental LSV data for VMS with chloride and SES (solid line) and corresponding fit with equation (2) (dashed line).

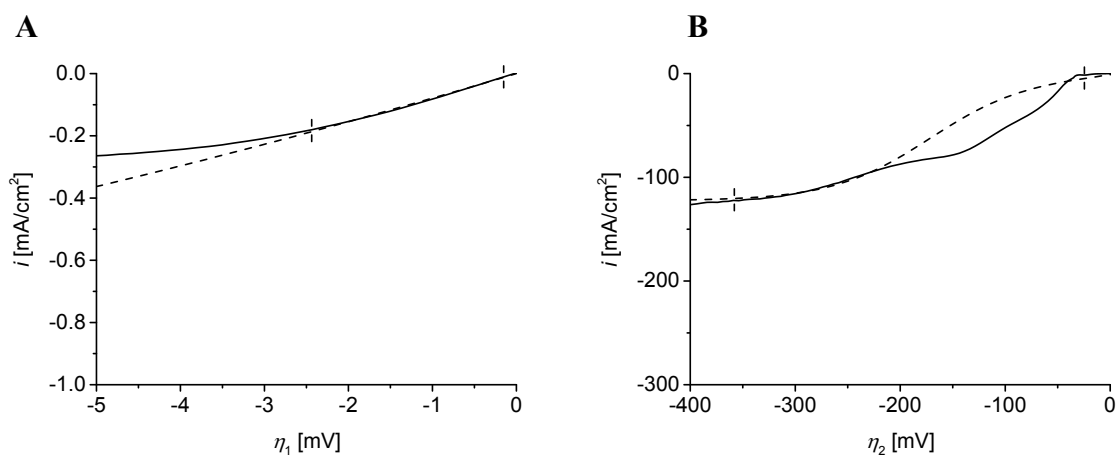

**Figure S2.** (A) Experimental LSV data for VMS with chloride and SBS (solid line) and corresponding fit with equation (3) (dashed line). (B) Experimental LSV data for VMS with chloride and SBS (solid line) and corresponding fit with equation (2) (dashed line).

In accordance with [T. P. Moffat, D. Wheeler, D. Josell, *Journal of The Electrochemical Society* **2004**, *151*, C262-C271.], no attempt was made to describe the peak(s) evident at overpotentials between approximately -50 mV and -200 mV.

**Table S3.** Raman mode assignments.  $\nu$  = stretch,  $\delta$  = bend,  $\tau$  = torsion,  $\rho$  = rock,  $\omega$  = wag

| <u>Peak</u> | <u>Observed Raman Shift (cm<sup>-1</sup>)</u> |      |      |                       |                       |                       | <u>Assignment</u>                              | <u>References</u> |
|-------------|-----------------------------------------------|------|------|-----------------------|-----------------------|-----------------------|------------------------------------------------|-------------------|
|             | SES                                           | SPS  | SBS  | SES + Cl <sup>-</sup> | SPS + Cl <sup>-</sup> | SBS + Cl <sup>-</sup> |                                                |                   |
| <b>a</b>    | 290                                           | 289  | 294  |                       |                       |                       | $\nu(\text{Cu-SO}_4)$                          | 1-6               |
| <b>b</b>    |                                               |      |      | 287                   | 280                   | 277                   | $\nu(\text{Cu-Cl})$                            | 2-4,7-9           |
| <b>c</b>    |                                               |      |      | 371                   |                       |                       | undefined $\tau$ -mode                         | 10                |
| <b>d</b>    | 435                                           | 441  |      | 439                   | 441                   |                       | $\delta(\text{CCC/CCS})$                       | 11-13             |
| <b>e</b>    | 527                                           | 529  | 530  | 528                   | 531                   | 535                   | $\rho(\text{SO}_2)$                            | 10,14             |
| <b>f</b>    | 570                                           | 569  |      | 571                   | 566                   |                       | $\delta(\text{SO}_2)$                          | 10                |
| <b>g</b>    | 616                                           | 617  | 609  | 612                   | 620                   | 609                   | <i>gauche</i> $\nu(\text{C-S})_{\text{thiol}}$ | 12,15-18          |
| <b>h</b>    | 632                                           |      |      | 631                   |                       |                       | <i>gauche</i> $\nu(\text{C-S})_{\text{thiol}}$ | 9,12-19           |
| <b>i</b>    | 683                                           | 677  | 680  | 693                   | 681                   | 679                   | <i>trans</i> $\nu(\text{C-S})_{\text{thiol}}$  | 9,12,13,16,18,19  |
| <b>j</b>    | 725                                           | 733  | 726  |                       | 733                   | 726                   | $\rho(\text{CH}_2)$                            | 9,13-15,17        |
| <b>k</b>    | 787                                           | 794  | 790  | 794                   | 796                   | 791                   | $\nu(\text{C-SO}_3)$                           | 9,19,20           |
| <b>l</b>    |                                               | 849  |      |                       | 851                   |                       | $\rho(\text{CH}_2)$                            | 9,12              |
| <b>m</b>    | 907                                           | 916  |      | 900                   | 917                   |                       | $\rho(\text{CH}_2)$                            | 11,13             |
| <b>n</b>    |                                               | 957  |      |                       | 952                   |                       | <i>gauche</i> $\nu(\text{C-C})$                | 12                |
| <b>o</b>    | 970                                           | 968  | 972  |                       |                       | 969                   | $\nu(\text{SO}_4^{2-})$                        | 3,5,6,8,9,15      |
| <b>p</b>    | 1023                                          | 1024 | 1026 | 1034                  | 1033                  | 1026                  | <i>trans</i> $\nu(\text{C-C})$                 | 13,18             |
| <b>q</b>    | 1210                                          | 1206 | 1200 |                       |                       |                       | $\nu(\text{SO}_2)$                             | 6,9,14,20-22      |
| <b>r</b>    | 1240                                          | 1231 | 1248 |                       | 1240                  | 1248                  | $\omega(\text{CH}_2)$                          | 9,11,14,17,20     |
| <b>s</b>    | 1288                                          | 1271 | 1304 | 1294                  | 1271                  | 1303                  | $\omega(\text{CH}_2)$                          | 9-12,23,24        |
| <b>t</b>    |                                               | 1345 | 1353 |                       | 1345                  | 1347                  | $\delta(\text{CH}_2)$                          | 9,11,24           |
| <b>u</b>    | 1404                                          | 1417 | 1418 | 1407                  | 1416                  | 1413                  | $\delta(\text{CH}_2)$                          | 9,11,14,23        |

- (1) Pettinger, B.; Philpott, M. R.; Gordon, J. G. *The Journal of Physical Chemistry* **1981**, *85*, 2746.
- (2) Hope, G. A.; Woods, R. *Journal of The Electrochemical Society* **2004**, *151*, C550.
- (3) Brown, G. M.; Hope, G. A. *Journal of Electroanalytical Chemistry* **1996**, *405*, 211.
- (4) Chan, H. Y. H.; Takoudis, C. G.; Weaver, M. J. *The Journal of Physical Chemistry B* **1999**, *103*, 357.
- (5) Brown, G. M.; Hope, G. A. *Journal of Electroanalytical Chemistry* **1995**, *382*, 179.
- (6) Fu, X.; Yang, G.; Sun, J.; Zhou, J. *The Journal of Physical Chemistry A* **2012**, *116*, 7314.
- (7) Schmitt, K. G.; Schmidt, R.; von-Horsten, H. F.; Vazhenin, G.; Gewirth, A. A. *The Journal of Physical Chemistry C* **2015**, *119*, 23453.
- (8) Niaura, G.; Malinauskas, A. *Journal of the Chemical Society, Faraday Transactions* **1998**, *94*, 2205.
- (9) Schultz, Z. D.; Feng, Z. V.; Biggin, M. E.; Gewirth, A. A. *Journal of The Electrochemical Society* **2006**, *153*, C97.
- (10) Johnson, N. O.; Turk, J. T.; Bull, W. E.; Mayfield Jr, H. G. *Inorganica Chimica Acta* **1977**, *25*, 235.
- (11) Bensebaa, F.; Zhou, Y.; Brolo, A. G.; Irish, D. E.; Deslandes, Y.; Kruus, E.; Ellis, T. H. *Spectrochimica Acta Part A: Molecular and Biomolecular Spectroscopy* **1999**, *55*, 1229.
- (12) Sandhyarani, N.; Pradeep, T. *Vacuum* **1998**, *49*, 279.
- (13) Ha Joo, T.; Kim, K.; Soo Kim, M. *Journal of Molecular Structure* **1987**, *158*, 265.
- (14) Pasquale, M. A.; Bolzán, A. E.; Güida, J. A.; Piatti, R. C. V.; Arvia, A. J.; Piro, O. E.; Castellano, E. E. *Solid State Sciences* **2007**, *9*, 862.
- (15) Bozzini, B.; D'Urzo, L.; Romanello, V.; Mele, C. *Journal of The Electrochemical Society* **2006**, *153*, C254.
- (16) Kudelski, A. *Journal of Raman Spectroscopy* **2003**, *34*, 853.
- (17) Bloxham *Chemija*.
- (18) Bryant, M. A.; Pemberton, J. E. *Journal of the American Chemical Society* **1991**, *113*, 8284.
- (19) Kudelski, A. *Langmuir* **2002**, *18*, 4741.
- (20) Li, Y.-S.; Wang, Y.; Church, J. S.; Garzena, F.; Zhang, Z.; An, D. *Spectrochimica Acta Part A: Molecular and Biomolecular Spectroscopy* **2003**, *59*, 1791.
- (21) Lennartz, M.; Broekmann, P.; Arenz, M.; Stuhlmann, C.; Wandelt, K. *Surface Science* **1999**, *442*, 215.
- (22) Arenz, M.; Broekmann, P.; Lennartz, M.; Vogler, E.; Wandelt, K. *physica status solidi (a)* **2001**, *187*, 63.
- (23) Kudelski, A.; Pecul, M.; Bukowska, J. *Journal of Raman Spectroscopy* **2002**, *33*, 796.
- (24) Keefe, C. D.; Jaspers-Fayer, S. *Vibrational Spectroscopy* **2011**, *57*, 72.
